# Supplementary material
Source: MDPI journal article supplement (https://www.mdpi.com/2073-4336/9/3/56)
Supplement: s1 [file s1]

Thank you very much for taking out time and participating in the experiment. All the decisions that you take during the experiment and your performance will not be shared with anyone. The data collected through the experiment will be used only for the purpose of research.

The experiment is spread over 60 minutes. You are not allowed to communicate with each other. You will be given a participation fee of 250 rupees. During the experiment, based on how many tasks you complete; you will be paid additional money. The data collected through the experiment will only be used for the research purposes and your personal information will never be shared.

If anyone is found talking to someone else, he or she will be disqualified from the experiment. Kindly work on your own and if you have any question raise your hand. The experimenter will come to you to answer your questions. Only relevant questions will be answered. Use of mobile phones and calculator is strictly prohibited.

### **Task**

During the experiment you are given 2-digit tasks, which are named as Standard Tasks. Following examples will make this task clear.

$$19+58= ?$$

$$21+33= ?$$

During the experiment, you will be asked to indicate the number of 2-digit (standard) tasks you are willing to solve in 6 minutes in the following table.

Please indicate how many addition problems would you be willing and able to solve in 6 minutes in the following hypothetical situations.  
Consider both the tax rate and the difficulty level.

|                       |                      |                      |                      |
|-----------------------|----------------------|----------------------|----------------------|
| piece rate            | 3 Rs                 | 3 Rs                 | 3 Rs                 |
| difficulty / tax rate | 85%                  | 50%                  | 15%                  |
| STANDARD              | <input type="text"/> | <input type="text"/> | <input type="text"/> |

**OK**

**Help**  
Remember that putting 0 in any of the cells indicates that you would not (!) have to solve any addition problem and your pay would be 90 Rs for the round.

The columns of the table show piece rates. Along with piece rates, there are 3 tax rates as well. The piece rate is 3 rupees for all the tasks while three tax rates are 85%, 50% and 15%. If you move from left to right in a row, the piece rate remains same while the tax rates decreases from 85% to 15%. Fill in each cell of the above table while taking into account piece rate, tax rates and time duration of 6 minutes. Once you fill in the table, one of your filled cells will be randomly selected and you will be given exact 6 minutes to solve the tasks declared in the selected cell.

## Earnings

Your earning function is as follows.

$$\text{Earnings} = 3 * \text{Number of correctly completed Tasks} * (1 - \text{Tax Rate})$$

Suppose the cell with 50% tax rate is selected. Suppose you wrote 100 in that cell and if you correctly solve 100 tasks in 6 minutes, your earnings will be as follows.

$$\text{Earnings} = 3 * 100 * (1 - 0.5)$$

$$\text{Earnings} = 150 \text{ rupees}$$

If you do not solve the number of tasks in 6 minutes, your earnings will be reduced by 50%.

If you write zero in any of the cells of the table and experimenter selects that cell, you do not need to work on any tasks. You will get 90 rupees as a flat payment.

The money earned during the experiment will be given at the end of the experiment along with the fixed participation fee of 250 rupees in a sealed envelope.

Hope you have good time during the experiment.
