# Supplementary material
Source: MDPI journal article supplement (https://www.mdpi.com/2073-4336/9/3/56)
Supplement: s1 [file s1]

Thank you very much for taking out time and participating in the experiment. All the decisions that you take during the experiment and your performance will not be shared with anyone. The data collected through the experiment will be used only for the purpose of research.

The experiment is spread over 60 minutes. You are not allowed to communicate with each other. You will be given a participation fee of 250 rupees. During the experiment, based on how many tasks you complete; you will be paid additional money. The data collected through the experiment will only be used for the research purposes and your personal information will never be shared.

If anyone is found talking to someone else, he or she will be disqualified from the experiment. Kindly work on your own and if you have any question raise your hand. The experimenter will come to you to answer your questions. Only relevant questions will be answered. Use of mobile phones and calculator is strictly prohibited.

### **Task**

During the experiment you are given 2-digit tasks. Following examples will make this task clear.

$$19+58= ?$$

$$21+33= ?$$

Experiment is divided into 6 rounds. The time for each round is 3 minutes. In total you will be having 18 minutes for the 6 rounds. You can solve as many tasks as you want in each round.

### **Earnings**

For each correctly completed task, you will be paid 3 rupees. But there will a tax deducted from your earnings. Your earning function is as follows.

Earnings in Round  $y = 3 * \text{Number of correctly completed Tasks in Round } y * (1 - \text{Tax Rate})$

The above-mentioned earning function will be calculated for each of the 6 rounds.

Suppose you are in 4th round and suppose tax rate in 4th round is 50%. Suppose you solved 10 tasks. So your earnings will be as follows.

$$\text{Earnings in Round 4} = 3 * 10 * (1 - 0.5)$$

$$\text{Earnings in Round 4} = 15 \text{ rupees}$$

The tax rate will vary in all of the 6 rounds.

You can either choose to solve the tasks or skip any round if you want. If you want to skip any round, you can press the button displayed on the bottom of the screen at the

beginning of the round and in turn can earn 15 rupees for each round that you skip. There will be no tax deducted from your earnings for the round you choose to skip. If you skip any round, please wait for 3 minutes for the next round to start.

The cumulative money for all the 6 rounds will be given at the end of the experiment along with the fixed participation fee of 250 rupees in a sealed envelope.

Hope you have good time!
